# Supplementary material for: Relationship of Acute Ischemic and Hemorrhagic Stroke with Weather and its Parameters.
Source: Research Square preprint supplement (doi:10.21203/rs.3.rs-7727415/v1), 2026-01-05
Supplement: Supplementary file 1 [file b8d7142991bc55eb0c0eff39.docx]

**Proforma**

Name______________________________________________________________________

Age_________________ Sex__________________ Mobile __________________________

Urban/Rural_____________________________

Date of stroke ___________ Time_______ Month __________Year _______ Season _______

Minimum Temperature (0C) _________________Maximum Temperature (0C) ____________

Atmospheric Pressure (hPA) ________Relative Humidity (%) _______Wind speed(km/s) ____

• Co-morbidities

1.

2.

3.

4.

Hypertension Yes/No______

Diabetes Mellitus Yes/No______

Compliance to Treatment Yes/No_____________

Compliance to Treatment Yes/No_____________

Regular BP Monitoring Yes/No_____________

Regular BP Monitoring Yes/No_____________

Type of Anticoagulation VKAs/NOACs_________

History of Atrial fibrillation Anticoagulation Yes/No______ Yes/No______

Previous history of stroke (AIS/ICH)_____________________________________

• Type of stroke ICH/AIS____________________________________________________________

Blood Pressure on Admission___________________________________________

• Investigations

ECG___________ Echo___________________ Carotid Doppler______________________

24 hour Holter______________________ Lipids___________________HBA1C__________

CT_________________________________ MRI __________________________________

CT Angio/MR Angio/DSA______________________________________________________

Other relevant Investigations__________________________________________________

Complications _________________________________________________________

Hospital Stay (days) ______________________________________________________

Death (Yes/No)________________________________________________________________

Ischemic Stroke (AIS)

Type (TOAST classification)___________________________________________________

Territory/Site______________________________________________________________
