# Supplementary figures and images for: Relationship of Acute Ischemic and Hemorrhagic Stroke with Weather and its Parameters.
Source: Research Square preprint supplement (doi:10.21203/rs.3.rs-7727415/v1), 2026-01-05

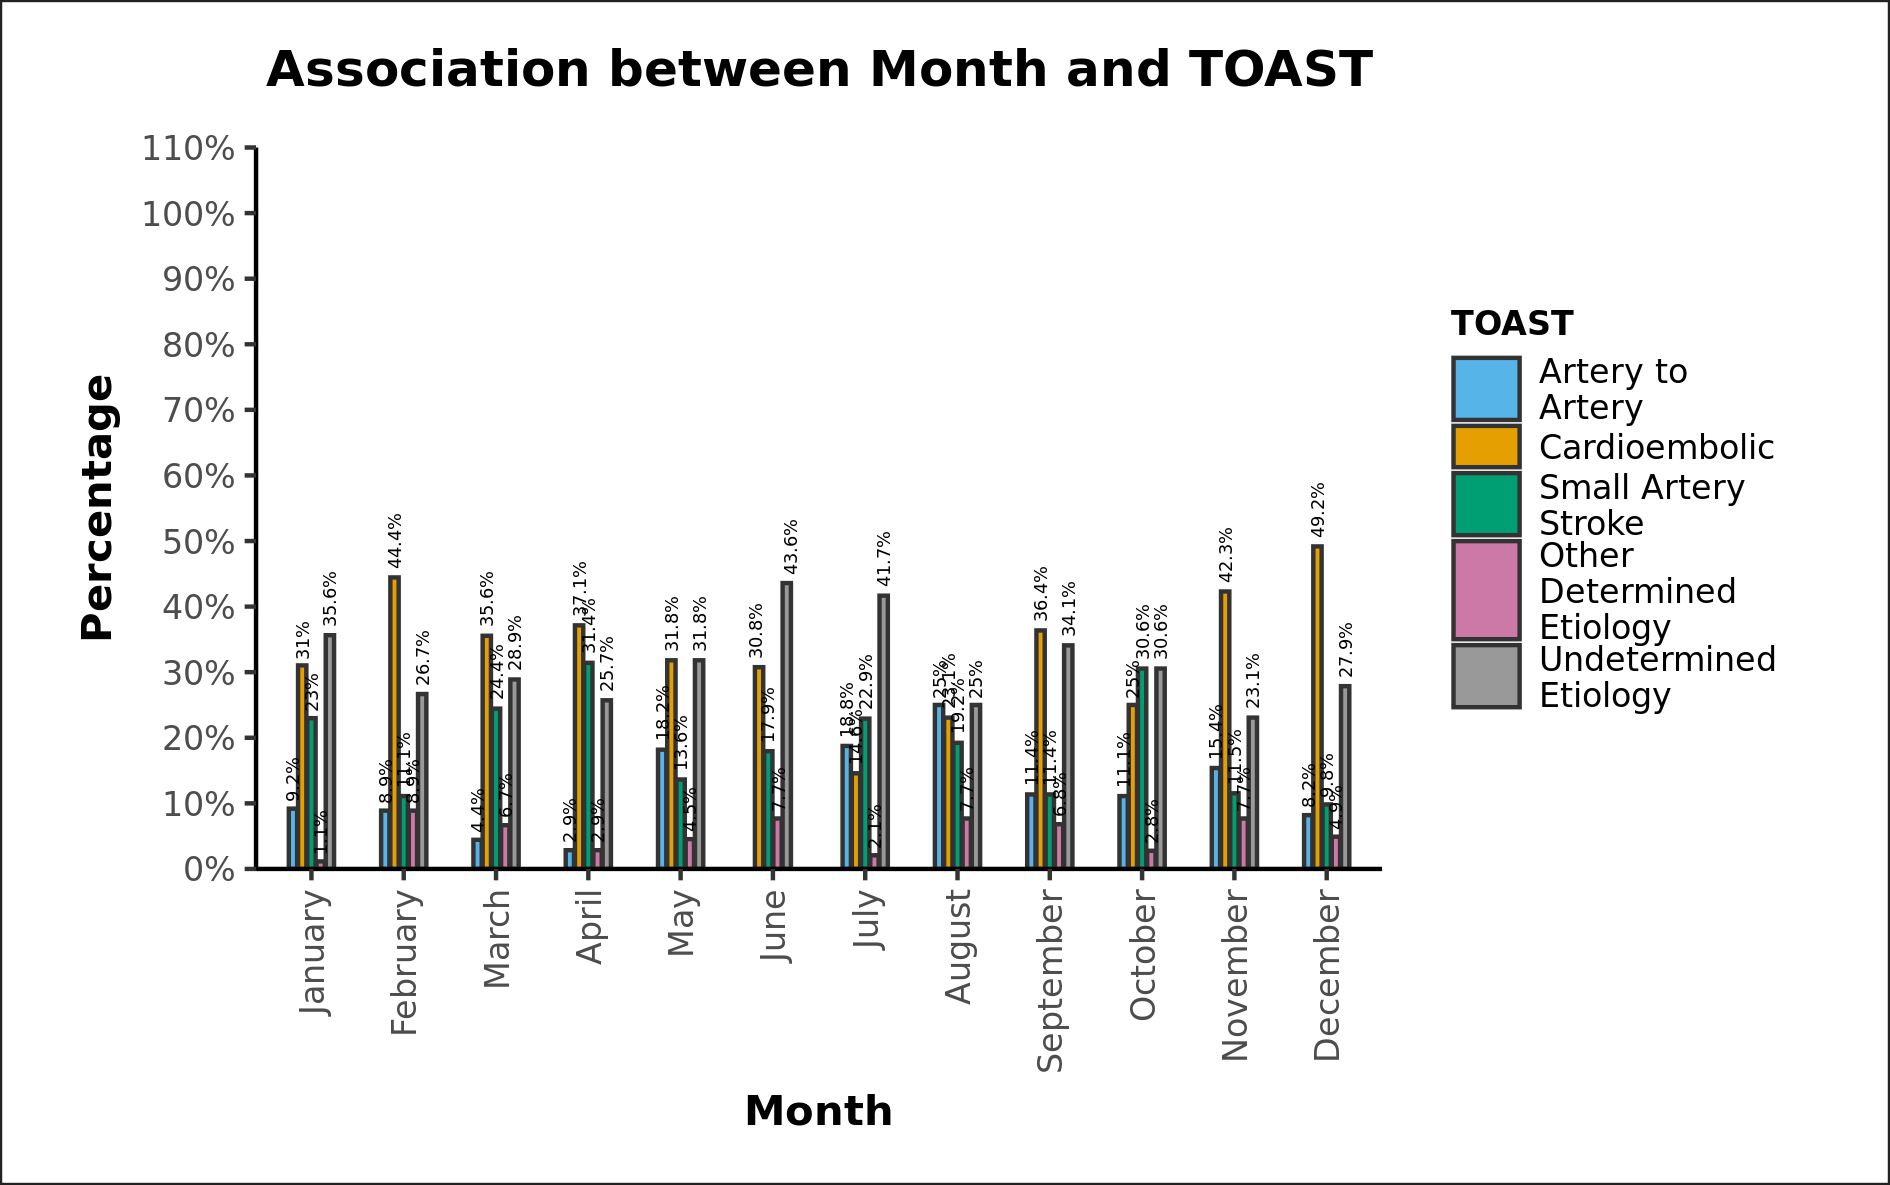


Supp 1: Distribution of ischemic stroke subtypes (as per TOAST schema) in different months

Supplement: Supplementary file 2 [file f5b2ddbf000cedcef0d5a9e2.docx]
